# Supplementary material
Source: Springer Nature journal article supplement (https://www.springermedizin.de/resource/supplementary/12889_2012_3992_MOESM2_ESM.pdf/9490912)
Supplement: MOESM2 [file 9490912]

## Enrollment

Assessed for eligibility (n=172 teachers from 94 primary schools)

Excluded (n=8 teachers from 3 schools declined to participate because of unknown reasons)

Randomized (n=91 primary schools with 164 teachers)

## Allocation

Allocated to intervention group (n=45 schools)  
♦ Withdrawal of consent because of too much effort (n=1 teacher from n=1 school)

Allocated to control group (n=46 schools)  
♦ Withdrawal of consent because of randomization in control group (n=6 teachers from n=4 schools)

## Baseline

Baseline measurements in intervention group (n=81 classes from n=44 schools)

Baseline measurements in control group (n=76 classes from n=42 schools)

♦ Withdrawal of consent because of unknown reasons (n=1 teacher from n=1 school)

♦ Withdrawal of consent because of request of parents (n=1 teacher from n=1 school\*)  
♦ Withdrawal of consent because of school burnt down (n=1 teacher from n=1 school)

## Follow-Up

Follow-up measurements in intervention group (n=80 classes from n=43 schools)

Follow-up measurements in control group (n=74 classes from n=41 schools)

\*school remained in Baden-Württemberg Study because another class from this school remained in the study
